# Supplementary material
Source: PubMed Central journal article supplement (PMC452595)

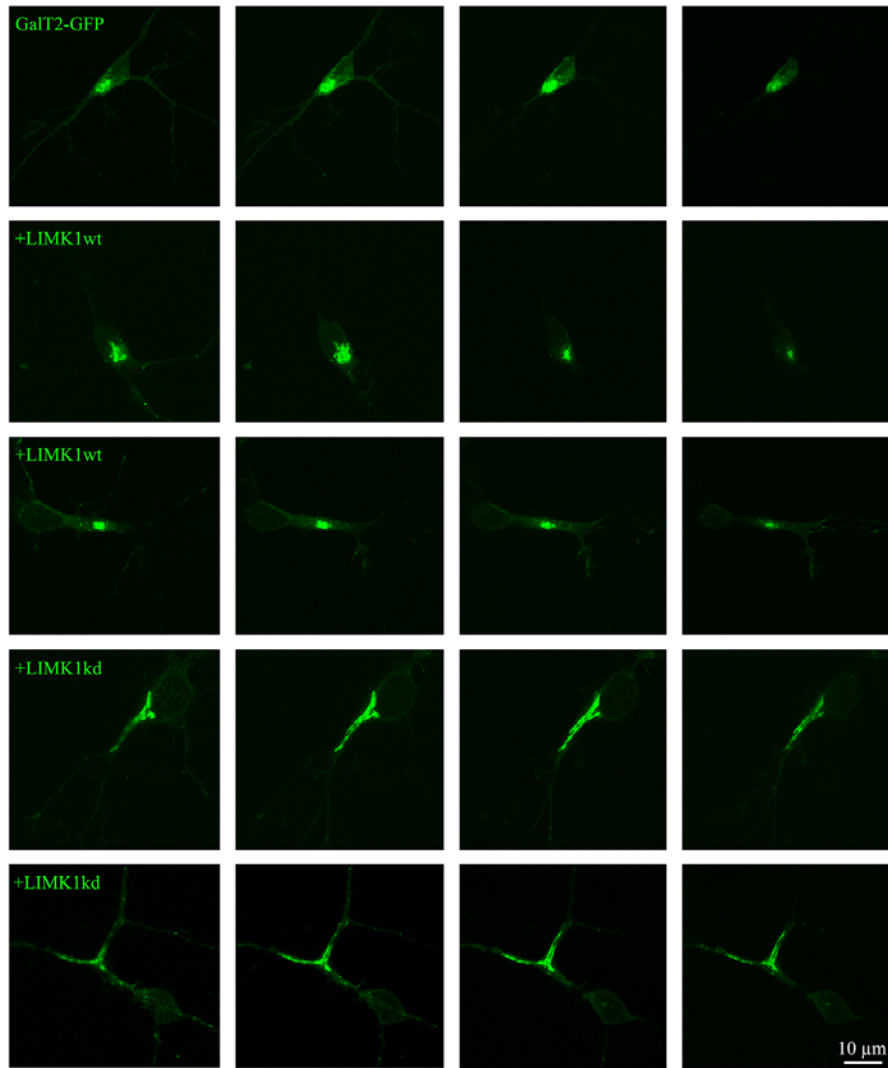

Supplement: mbc_15_7_3433__1.pdf [file mbc_15_7_3433__1.pdf]

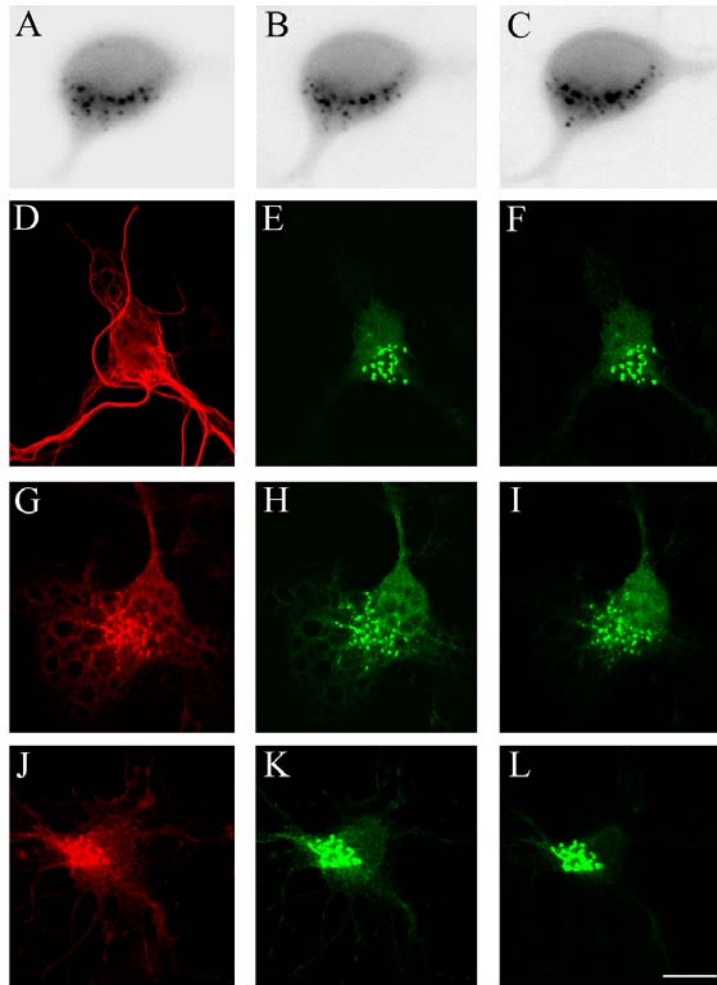

Supplement: mbc_15_7_3433__2.pdf [file mbc_15_7_3433__2.pdf]

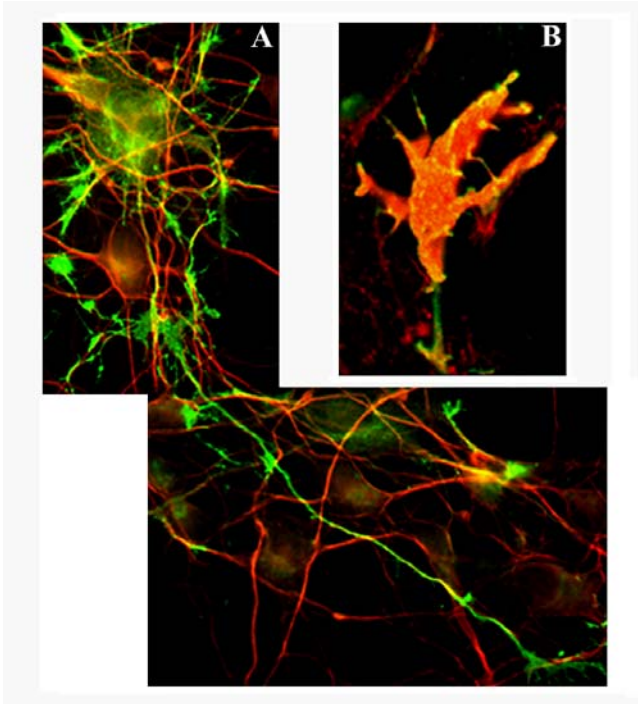

Supplement: mbc_15_7_3433__3.pdf [file mbc_15_7_3433__3.pdf]

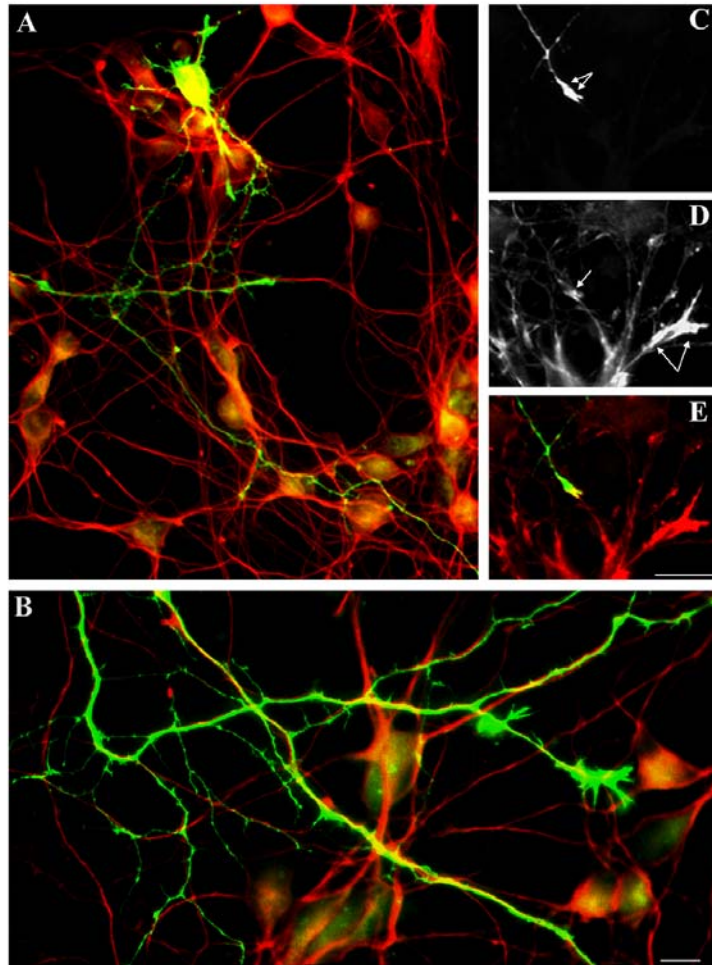

Supplement: mbc_15_7_3433__4.pdf [file mbc_15_7_3433__4.pdf]
